# Supplementary material for: A comprehensive analysis of the effects of DGAT1 K232A polymorphism on milk production and fertility traits in Holstein Friesian and Jersey cows reared in Türkiye
Source: Copernicus journal article supplement (doi:10.5194/aab-67-455-2024), 2024-10-02
Supplement: Supplementary file [file aab-67-455-2024-supplement.pdf]

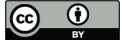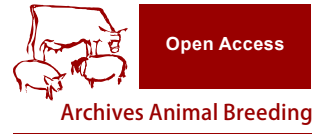

*Supplement of*

## **A comprehensive analysis of the effects of *DGAT1* K232A polymorphism on milk production and fertility traits in Holstein Friesian and Jersey cows reared in Türkiye**

**Sena Ardıçlı et al.**

*Correspondence to:* Ozden Cobanoglu (ocobanoglu@uludag.edu.tr)

The copyright of individual parts of the supplement might differ from the article licence.

**Table S1.** Levels of significance, least-squares means, and standard errors for the effect of *DGATI* K232A genotypes on fertility traits in Holstein-Friesian cows ( $n=361$ ).

| Traits                               | Genotype  |           | <i>p</i> -value |
|--------------------------------------|-----------|-----------|-----------------|
|                                      | KA        | KK        |                 |
| Number of inseminations <sup>1</sup> | 2.27±0.07 | 2.20±0.29 | 0.820           |
| Calving ease <sup>2</sup>            | 2.20±0.06 | 2.18±0.32 | 0.955           |

<sup>1</sup>Number of inseminations per conception

<sup>2</sup>Calving ease was assessed using a scale based on the following criteria: 1 = unassisted calvings; 2 = calvings requiring minor assistance; 3 = calvings requiring hands-on help; and 4 = calvings that necessitated Caesarean sections. Due to a low number of animals in category 4, categories 3 and 4 were merged and recoded as 3 to address the issue of sparse data in the most severe category.
